# Supplementary material
Source: MDPI journal article supplement (https://www.mdpi.com/2227-9040/9/11/314)
Supplement: s1 [file s1]

Supporting information

# Rapid Screening of Butyl Paraben Additive in Toner Sample by Molecularly Imprinted Photonic Crystal

Yangyang Liu <sup>1</sup>, Hang Gu <sup>1,2</sup>, Jiahua He <sup>1</sup>, Anqi Cui <sup>1</sup>, Xiaoyi Wu <sup>1</sup>, Jiaping Lai <sup>3,\*</sup> and Hui Sun <sup>1,\*</sup>

<sup>1</sup> School of Environmental Science and Engineering, Guangzhou University, Guangzhou 510006, China; 3220215206@bit.edu.cn (Y.L.); guhang@mail2.sysu.edu.cn (H.G.); hejh@iqtcnet.cn (J.H.); 2112004031@e.gzhu.edu.cn (A.C.); 2112004007@e.gzhu.edu.cn (X.W.)

<sup>2</sup> School of Environmental Science and Engineering, Sun Yat-sen University, Guangzhou 510006, China

<sup>3</sup> School of Chemistry, South China Normal University, Guangzhou 510006, China

\* Correspondence: laijp@scnu.edu.cn (J.L.); esesunhui@gzhu.edu.cn (H.S.)

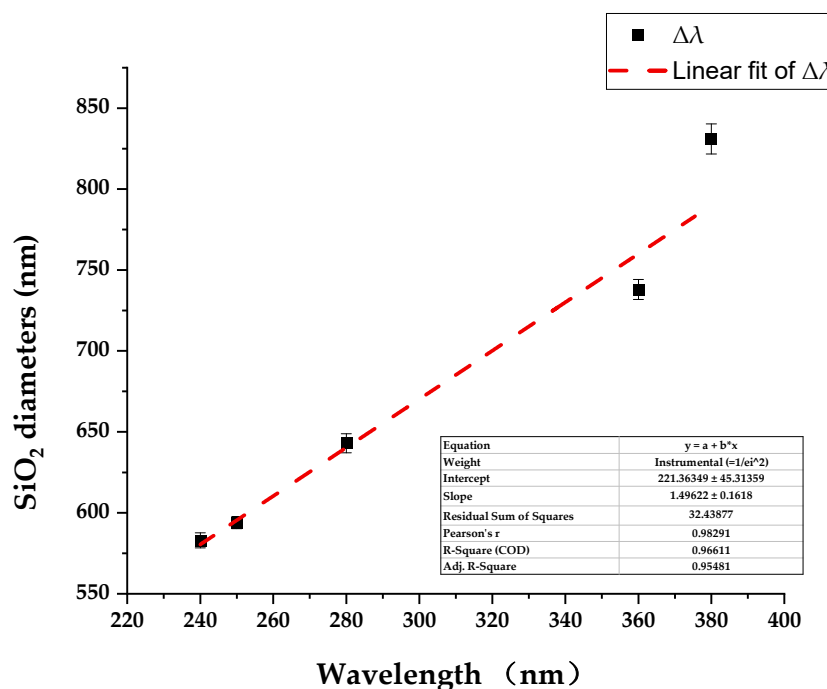

**Figure S1** The correlation between the SiO<sub>2</sub> diameters and the diffraction peak of MIPC.
